# Supplementary material for: Tailoring the electrical properties of multilayer MoS2 transistors using ultraviolet light irradiation
Source: Royal Society of Chemistry journal article supplement (doi:10.1039/c5ra14509k), 2015-01-01
Supplement: c5ra14509k1.pdf [file c5ra14509k1.pdf]

## **Tailoring the Electrical properties of Multilayer MoS<sub>2</sub> Transistors by Ultraviolet Light Irradiation**

Arun Kumar Singh<sup>1,2\*</sup>, Shaista Andleeb<sup>2</sup>, Jai Singh<sup>3</sup> and Jonghwa Eom<sup>2</sup>

<sup>1</sup> Department of Physics, Motilal Nehru National Institute of Technology, Allahabad-211004, India.

<sup>2</sup> Department of Physics and Graphene Research Institute, Sejong University, Seoul 143-747, Korea.

<sup>3</sup> Department of Nano Science and Technology, Institute of Nano and Advanced Materials Engineering, Sejong University, Seoul 143-747, Korea.

\* Corresponding Author -E.mail: [arunsigh.itbhu@gmail.com](mailto:arunsigh.itbhu@gmail.com)

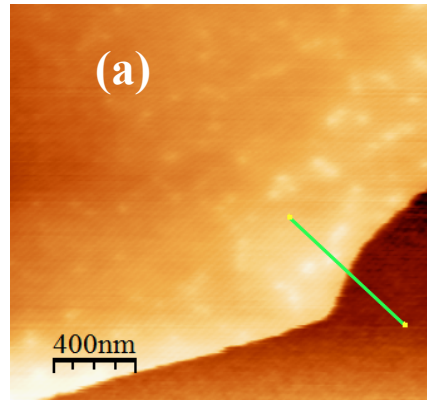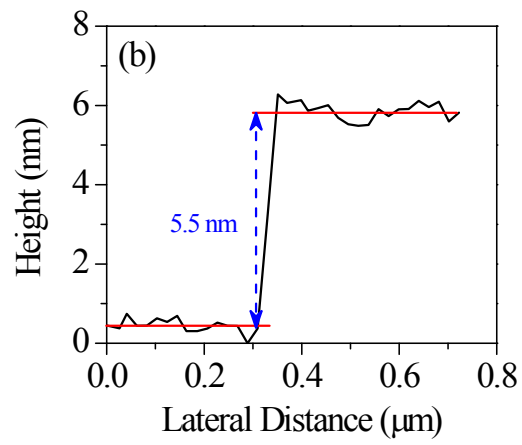

Figure S1 (a)AFM image of ML MoS<sub>2</sub> and (b) corresponding height profile.

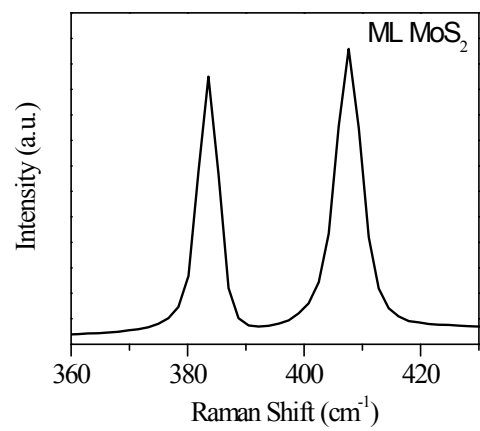

Figure S2- Raman spectra of pristine ML MoS<sub>2</sub>.

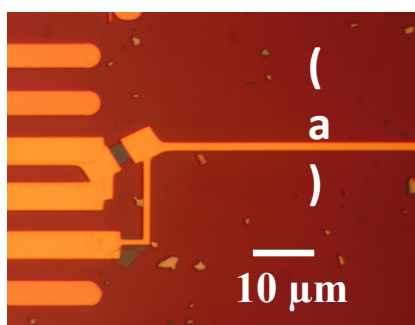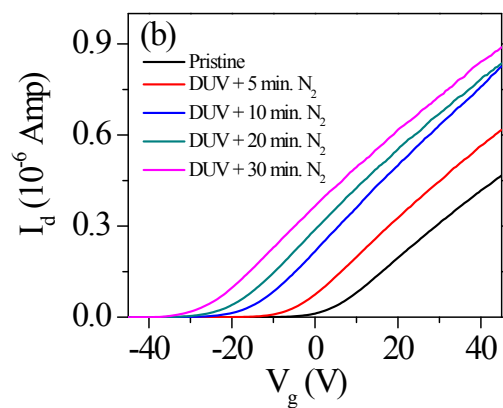

Figure S3- (a) Optical image of mechanically fabricated ML MoS<sub>2</sub> FET device. (b) The  $I_D$ - $V_{bg}$  characteristics with different exposure time of N<sub>2</sub> gas under DUV light for ML MoS<sub>2</sub> transistors.

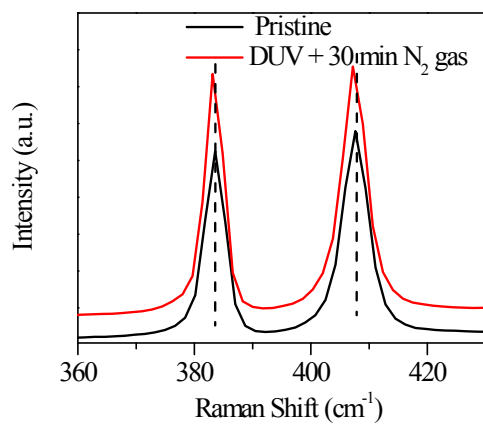

Figure S4- Raman spectra of pristine and 30 minutes N<sub>2</sub> gas expose ML MoS<sub>2</sub> under DUV light
